# Supplementary material for: Stomatal conductance bears no correlation with transpiration rate in wheat during their diurnal variation under high air humidity
Source: PeerJ. 2020 Apr 28;8:e8927. doi: 10.7717/peerj.8927 (PMC7199760; doi:10.7717/peerj.8927)
Supplement: Supplemental Information 1 — The measurement dates and specific meteorological conditions are shown in Table 2. T, air temperature; RH, air relative humidity; VPD, vapor pressure deficit; PAR, photosynthetically active radiation; WW, soil well-watered; DS, soil drought stress; LRH, low relative humidity; MRH, moderate relative humidity; HRH, high relative humidity. [file peerj-08-8927-s001.xls]

## Sheet: LRH-WW
Time	Genetype	Replicate	Tr	gs	T	RH	VPD	PAR
			mmol·m−2·s−1	mol·m−2·s−1	℃	%	kPa	μmol·m−2·s−1
8:00-10:00	12 Song 1	1	4.43187	0.1907	19.3	19.5	1.53698	513
		2	2.12974	0.1052	19.2	21.6	1.48865	518
		3	2.07028	0.1011	19.4	19.4	1.5474	523
10:00-12:00		1	7.07193	0.3043	21.7	13.1	1.89197	910
		2	4.24612	0.2177	21.6	13.2	1.87956	915
		3	5.58225	0.2402	21.8	13	1.90445	920
12:00-14:00		1	4.93146	0.2685	23.45	11.8	2.11037	1190
		2	6.32128	0.272	23.35	11.9	2.0967	1195
		3	4.44349	0.1912	23.55	11.7	2.12412	1200
14:00:16:00		1	4.03843	0.2168	22.62	15.2	1.94045	1155
		2	3.09324	0.1331	22.52	15.3	1.92774	1160
		3	3.54042	0.2384	22.72	15.1	1.95324	1165
16:00-18:00		1	3.7888	0.12	21.6	17.9	1.77779	865
		2	3.4402	0.105	21.5	18	1.766	870
		3	2.1374	0.135	21.7	17.8	1.78964	875
8:00-10:00	Zhoumai 18	1	3.1296	0.1304	19.6	18	1.59172	556
		2	1.5576	0.0649	19.5	18.1	1.58105	561
		3	3.47399	0.1259	19.7	17.9	1.60245	566
10:00-12:00		1	3.7992	0.1583	22.6	12.2	2.00693	955
		2	4.47196	0.1284	22.5	12.3	1.99386	960
		3	4.4328	0.1847	22.7	12.1	2.02008	965
12:00-14:00		1	2.4336	0.1014	23.6	11.6	2.13223	1235
		2	1.68339	0.0527	23.5	11.7	2.11844	1240
		3	1.8096	0.0754	23.7	11.5	2.1461	1245
14:00:16:00		1	3.21738	0.1076	22.55	15.4	1.92858	1113
		2	4.0224	0.1676	22.45	15.5	1.91593	1118
		3	4.956	0.2065	22.65	15.3	1.9413	1123
16:00-18:00		1	4.968	0.082	21.2	18.3	1.73107	835
		2	2.608	0.067	21.1	18.4	1.71956	840
		3	3.328	0.097	21.3	18.2	1.74264	845
8:00-10:00	Jing 411	1	7.50177	0.2033	19.7	17.5	1.61026	569
		2	4.774	0.217	19.6	17.6	1.59948	574
		3	6.60272	0.3347	19.8	17.4	1.6211	579
10:00-12:00		1	9.295	0.4225	22.9	11.9	2.0466	970
		2	11.547	0.3699	22.8	12	2.0333	975
		3	9.68	0.44	23	11.8	2.05998	980
12:00-14:00		1	7.32402	0.2466	23.65	11.55	2.13916	1250
		2	5.20782	0.2117	23.55	11.65	2.12532	1255
		3	5.33955	0.3991	23.75	11.45	2.15307	1260
14:00:16:00		1	2.257	0.1935	22.53	15.5	1.92422	1098
		2	2.7214	0.1237	22.43	15.6	1.9116	1103
		3	3.1604	0.0982	22.63	15.4	1.93692	1108
16:00-18:00		1	3.2	0.1	21.1	18.5	1.71745	825
		2	4.87	0.085	21	18.6	1.70602	830
		3	2.7485	0.115	21.2	18.4	1.72895	835
8:00-10:00	Lankaiaizao 8	1	1.24029	0.0601	19.1	21.5	1.48234	487
		2	1.65254	0.064	19	19.6	1.50986	492
		3	1.40807	0.0749	19.2	21.4	1.49245	497
10:00-12:00		1	1.0028	0.0436	21.1	13.7	1.8186	880
		2	0.394883	0.0281	21	13.8	1.80662	885
		3	0.4956	0.021	21.2	13.6	1.83065	890
12:00-14:00		1	7.3656	0.2232	23.35	12	2.09432	1160
		2	8.00835	0.3045	23.25	12.1	2.08074	1165
		3	5.19028	0.1285	23.45	11.9	2.10798	1170
14:00:16:00		1	3.6162	0.123	22.68	15.1	1.94903	1181
		2	6.21192	0.2353	22.58	15.2	1.93627	1186
		3	4.71156	0.1659	22.78	15	1.96187	1191
16:00-18:00		1	6.88716	0.1	21.8	17.6	1.80375	885
		2	8.00482	0.085	21.7	17.7	1.79182	890
		3	8.12119	0.115	21.9	17.5	1.81576	895
8:00-10:00	Chang 6878	1	3.22339	0.1783	19.9	16.5	1.64779	596
		2	4.77781	0.1575	19.8	16.6	1.6368	601
		3	4.4274	0.1884	20	16.4	1.65885	606
10:00-12:00		1	1.2032	0.0512	23.5	11.5	2.12323	1000
		2	2.97454	0.109	23.4	11.6	2.10949	1005
		3	1.06494	0.0357	23.6	11.4	2.13705	1010
12:00-14:00		1	4.5261	0.1926	23.75	11.4	2.15429	1280
		2	5.93292	0.1639	23.65	11.5	2.14037	1285
		3	4.05375	0.1725	23.85	11.3	2.16829	1290
14:00:16:00		1	3.5041	0.2689	22.5	15.6	1.91884	1073
		2	1.84515	0.1288	22.4	15.7	1.90624	1078
		3	5.2969	0.2254	22.6	15.5	1.9315	1083
16:00-18:00		1	2.82	0.12	20.8	18.7	1.68543	805
		2	2.4675	0.105	20.7	18.8	1.67419	810
		3	3.1725	0.135	20.9	18.6	1.69674	815
8:00-10:00	Jinmai 47	1	4.60062	0.2153	19.8	17	1.62895	581
		2	4.67092	0.2192	19.7	17.1	1.61806	586
		3	3.1176	0.1299	19.9	16.9	1.6399	591
10:00-12:00		1	8.02051	0.28	23.2	11.6	2.08697	985
		2	4.1184	0.1716	23.1	11.7	2.07344	990
		3	5.21322	0.2653	23.3	11.5	2.10058	995
12:00-14:00		1	3.9896	0.2079	23.7	11.5	2.1461	1265
		2	4.0608	0.1192	23.6	11.6	2.13223	1270
		3	3.9336	0.1639	23.8	11.4	2.16006	1275
14:00:16:00		1	3.1512	0.1313	22.52	15.5	1.92318	1085
		2	2.51592	0.1733	22.42	15.6	1.91057	1090
		3	1.9392	0.0808	22.62	15.4	1.93587	1095
16:00-18:00		1	3.136	0.089	21	18.6	1.70602	815
		2	1.776	0.074	20.9	18.7	1.69465	820
		3	2.496	0.104	21.1	18.5	1.71745	825

## Sheet: LRH-DS
Time	Genetype	Replicate	Tr	gs	T	RH	VPD	PAR
			mmol·m−2·s−1	mol·m−2·s−1	℃	%	kPa	μmol·m−2·s−1
8:00-10:00	12 Song 1	1	1.81504	0.0781	19.2	19.6	1.52663	513
		2	2.29341	0.1184	19.3	19.5	1.53698	518
		3	1.7284	0.1093	19.4	19.4	1.5474	513
10:00-12:00		1	1.6942	0.0729	21.6	13.2	1.87956	910
		2	1.52182	0.0775	21.7	13.1	1.89197	915
		3	1.58962	0.0684	21.8	13	1.90445	910
12:00-14:00		1	2.30773	0.0993	23.35	11.9	2.0967	1190
		2	0.9877	0.0425	23.45	11.8	2.11037	1195
		3	0.924206	0.0595	23.55	11.7	2.12412	1190
14:00:16:00		1	1.55243	0.0668	22.52	15.3	1.92774	1155
		2	1.62912	0.0701	22.62	15.2	1.94045	1160
		3	1.41996	0.0611	22.72	15.1	1.95324	1155
16:00-18:00		1	1.52719	0.0383	21.5	18	1.766	865
		2	0.8134	0.035	21.6	17.9	1.77779	870
		3	0.76692	0.033	21.7	17.8	1.78964	865
8:00-10:00	Zhoumai 18	1	1.48064	0.0661	19.5	18.1	1.58105	556
		2	2.1721	0.1015	19.6	18	1.59172	561
		3	1.66218	0.0813	19.7	17.9	1.60245	556
10:00-12:00		1	1.1928	0.0497	22.5	12.3	1.99386	955
		2	1.2816	0.0534	22.6	12.2	2.00693	960
		3	1.4982	0.0523	22.7	12.1	2.02008	955
12:00-14:00		1	1.71776	0.064	23.5	11.7	2.11844	1235
		2	1.6416	0.0684	23.6	11.6	2.13223	1240
		3	2.45339	0.0649	23.7	11.5	2.1461	1235
14:00:16:00		1	1.861	0.0615	22.45	15.5	1.91593	1113
		2	1.54541	0.0576	22.55	15.4	1.92858	1118
		3	1.4232	0.0593	22.65	15.3	1.9413	1113
16:00-18:00		1	1.42416	0.0368	21.1	18.4	1.71956	835
		2	0.67416	0.0318	21.2	18.3	1.73107	840
		3	1.1736	0.0489	21.3	18.2	1.74264	835
8:00-10:00	Jing 411	1	2.6004	0.1182	19.6	17.6	1.59948	569
		2	2.10702	0.1121	19.7	17.5	1.61026	574
		3	2.05998	0.0741	19.8	17.4	1.6211	569
10:00-12:00		1	1.72592	0.0644	22.8	12	2.0333	970
		2	2.1186	0.0963	22.9	11.9	2.0466	975
		3	2.47335	0.0951	23	11.8	2.05998	970
12:00-14:00		1	1.188	0.054	23.55	11.65	2.12532	1250
		2	1.42692	0.0564	23.65	11.55	2.13916	1255
		3	1.76605	0.0845	23.75	11.45	2.15307	1250
14:00:16:00		1	1.22171	0.0509	22.43	15.6	1.9116	1098
		2	1.012	0.046	22.53	15.5	1.92422	1103
		3	1.2958	0.0589	22.63	15.4	1.93692	1098
16:00-18:00		1	2.1556	0.0778	21	18.6	1.70602	825
		2	1.1324	0.0482	21.1	18.5	1.71745	830
		3	1.1748	0.0534	21.2	18.4	1.72895	825
8:00-10:00	Lankaiaizao 8	1	1.4841	0.0765	19	21.6	1.4723	487
		2	1.5093	0.0645	19.1	21.5	1.48234	492
		3	3.40452	0.1351	19.2	21.4	1.49245	497
10:00-12:00		1	1.54693	0.0539	21	13.8	1.80662	880
		2	1.40941	0.116	21.1	13.7	1.8186	885
		3	1.403	0.061	21.2	13.6	1.83065	880
12:00-14:00		1	2.13181	0.0495	23.25	12.1	2.08074	1160
		2	1.54164	0.0688	23.35	12	2.09432	1165
		3	2.87558	0.101	23.45	11.9	2.10798	1160
14:00:16:00		1	1.3018	0.0566	22.58	15.2	1.93627	1181
		2	1.31237	0.0499	22.68	15.1	1.94903	1186
		3	0.9338	0.0406	22.78	15	1.96187	1181
16:00-18:00		1	2.2535	0.0545	21.7	17.7	1.79182	885
		2	1.95014	0.0694	21.8	17.6	1.80375	890
		3	1.9039	0.0393	21.9	17.5	1.81576	885
8:00-10:00	Chang 6878	1	2.63555	0.0829	19.8	16.6	1.6368	596
		2	3.02015	0.1412	19.9	16.5	1.64779	601
		3	2.96335	0.1261	20	16.4	1.65885	596
10:00-12:00		1	2.46753	0.0854	23.4	11.6	2.10949	1000
		2	1.96136	0.0639	23.5	11.5	2.12323	1005
		3	1.99968	0.0793	23.6	11.4	2.13705	1000
12:00-14:00		1	3.68917	0.1127	23.65	11.5	2.14037	1280
		2	3.2607	0.0962	23.75	11.4	2.15429	1285
		3	2.89319	0.0907	23.85	11.3	2.16829	1280
14:00:16:00		1	2.7719	0.0754	22.4	15.7	1.90624	1073
		2	1.6893	0.0478	22.5	15.6	1.91884	1078
		3	2.5372	0.0712	22.6	15.5	1.9315	1073
16:00-18:00		1	2.39825	0.0595	20.7	18.8	1.67419	805
		2	1.8283	0.0778	20.8	18.7	1.68543	810
		3	1.62235	0.0581	20.9	18.6	1.69674	805
8:00-10:00	Jinmai 47	1	2.02761	0.0974	19.7	17.1	1.61806	581
		2	2.1624	0.0901	19.8	17	1.62895	586
		3	2.7408	0.1142	19.9	16.9	1.6399	581
10:00-12:00		1	1.69435	0.1037	23.1	11.7	2.07344	985
		2	2.79335	0.0971	23.2	11.6	2.08697	990
		3	2.0808	0.0867	23.3	11.5	2.10058	985
12:00-14:00		1	2.00809	0.1061	23.6	11.6	2.13223	1265
		2	2.5488	0.1062	23.7	11.5	2.1461	1270
		3	2.67764	0.0861	23.8	11.4	2.16006	1265
14:00:16:00		1	1.6296	0.0679	22.42	15.6	1.91057	1085
		2	2.0904	0.0871	22.52	15.5	1.92318	1090
		3	1.69792	0.0879	22.62	15.4	1.93587	1085
16:00-18:00		1	1.8672	0.0778	20.9	18.7	1.69465	815
		2	2.0654	0.0761	21	18.6	1.70602	820
		3	1.2792	0.0533	21.1	18.5	1.71745	815

## Sheet: MRH-WW
Time	Genetype	Replicate	Tr	gs	T	RH	VPD	PAR
			mmol·m−2·s−1	mol·m−2·s−1	℃	%	kPa	μmol·m−2·s−1
8:00-10:00	12 Song 1	1	2.58713	0.141563	18.9	59.6	0.842116	530
		2	3.47955	0.196212	19.3	49.1	1.08436	515
		3	4.2976	0.247542	19.1	48.7	1.08104	480
10:00-12:00		1	8.8049	0.367063	25.1	29.6	2.04377	860
		2	7.84432	0.337403	25.5	28.3	2.12548	870
		3	7.21683	0.263085	24.5	30	1.96922	904
12:00-14:00		1	5.91748	0.187464	28.5	21.4	2.72071	1250
		2	3.17703	0.193479	29.1	21.2	2.81249	1286
		3	6.50884	0.212644	29.7	23.1	2.82973	1272
14:00:16:00		1	9.59166	0.222205	28	22.3	2.62152	1503
		2	6.02339	0.16758	29.2	22.1	2.79457	1502
		3	7.99065	0.249472	29.9	22.7	2.87345	1445
16:00-18:00		1	6.42258	0.108069	26.8	22.7	2.45163	1205
		2	1.84943	0.0444543	27.1	24.7	2.42551	1200
		3	2.32991	0.0574012	27.2	20.8	2.56434	1186
8:00-10:00	Zhoumai 18	1	2.25397	0.107758	19.8	43.1	1.24555	500
		2	1.91821	0.0867464	19.6	42.7	1.24077	495
		3	1.98907	0.0899498	19.6	44.1	1.21045	509
10:00-12:00		1	3.45351	0.104596	25.1	30.4	2.02054	896
		2	1.85579	0.10509	25.7	37.6	1.86918	889
		3	2.04967	0.0583303	25.9	33.3	2.01891	912
12:00-14:00		1	8.8649	0.280819	28.6	22.6	2.69291	1280
		2	9.40731	0.302197	28.4	25.8	2.5553	1313
		3	9.64695	0.322761	28.7	30.2	2.44094	1285
14:00:16:00		1	3.89602	0.0999316	30.7	23.3	2.96884	1484
		2	7.06654	0.214917	27.7	21	2.62461	1468
		3	3.53367	0.108104	28.8	24.2	2.66433	1470
16:00-18:00		1	5.9378	0.157364	26.7	26.9	2.30645	1212
		2	2.37528	0.0558794	26.4	24.8	2.33611	1175
		3	3.88922	0.0983262	26.6	28.8	2.2349	1167
8:00-10:00	Jing 411	1	2.81157	0.133193	21.8	42.2	1.40916	524
		2	2.18315	0.109244	22.2	42.5	1.43212	549
		3	4.99859	0.19647	22.1	38.7	1.51864	540
10:00-12:00		1	5.86203	0.123926	27	31.5	2.19511	948
		2	2.18315	0.164632	26	28.7	2.1694	978
		3	3.95171	0.176928	26	26.2	2.24547	962
12:00-14:00		1	8.43681	0.23421	25.9	24.5	2.28527	1318
		2	6.53899	0.106853	26.9	26.1	2.35595	1325
		3	6.67194	0.16846	28.1	25.8	2.51631	1376
14:00:16:00		1	6.99099	0.307437	29.8	20	2.95878	1415
		2	3.70298	0.206571	29.9	20.5	2.95523	1425
		3	5.24219	0.223359	29.7	21.1	2.90332	1355
16:00-18:00		1	6.95627	0.218903	26.5	23.5	2.38885	1146
		2	6.23422	0.190766	26.3	22.1	2.40746	1132
		3	4.77347	0.130166	26.3	22.2	2.40437	1168
8:00-10:00	Lankaiaizao 8	1	5.29383	0.200635	22.5	39.2	1.53872	570
		2	2.05156	0.0872796	22.6	39.2	1.54693	589
		3	3.61818	0.152435	22.5	37.9	1.57162	576
10:00-12:00		1	8.27415	0.359077	27.1	32.5	2.17427	992
		2	9.91679	0.325763	27.3	28.9	2.31399	999
		3	3.61818	0.331744	27.6	30.1	2.31036	1064
12:00-14:00		1	6.23374	0.227023	29.1	27.4	2.59121	1370
		2	9.91679	0.435999	29.1	23.1	2.74468	1427
		3	4.10856	0.231542	28.1	28.7	2.41797	1442
14:00:16:00		1	5.8449	0.214801	28.8	20.3	2.80142	1320
		2	5.75041	0.160202	28.6	22.6	2.69291	1365
		3	3.83494	0.295188	26.9	21.5	2.50259	1341
16:00-18:00		1	4.64152	0.129753	27	24.3	2.42584	1110
		2	8.19406	0.256818	27.6	22.9	2.54834	1103
		3	5.98661	0.167445	27.9	27.2	2.44362	1095
8:00-10:00	Chang 6878	1	7.19368	0.369215	23.1	40	1.56767	605
		2	4.50316	0.203492	23.3	37.8	1.64247	608
		3	4.67287	0.211948	23.4	38.5	1.6326	608
10:00-12:00		1	4.2025	0.13421	26.7	29.8	2.21495	1036
		2	5.78037	0.193737	27.4	27.4	2.37502	1052
		3	1.67064	0.0837	26	30.7	2.10855	1041
12:00-14:00		1	9.44294	0.345746	29.1	21.8	2.79108	1402
		2	9.62258	0.355033	29.2	25.1	2.68695	1482
		3	10.985	0.386061	29.1	22	2.78394	1520
14:00:16:00		1	10.4782	0.294139	26.4	21.1	2.45105	1346
		2	10.4672	0.294125	26.9	22	2.48665	1323
		3	10.8824	0.302038	26.8	22.7	2.45163	1357
16:00-18:00		1	8.80911	0.249114	26.8	20.4	2.52457	1066
		2	5.9491	0.155208	26.7	23.7	2.40742	1062
		3	5.93885	0.15476	26.6	22	2.44834	1003
8:00-10:00	Jinmai 47	1	2.55013	0.104526	23.5	32.5	1.80139	630
		2	3.50642	0.15106	23.2	34.7	1.71522	640
		3	3.18804	0.135094	23.3	39.9	1.58701	632
10:00-12:00		1	7.11057	0.261901	28.5	26.7	2.53726	1058
		2	3.47003	0.109273	28.6	26.7	2.55027	1064
		3	5.12163	0.173837	29	23.6	2.71297	1070
12:00-14:00		1	3.84232	0.107089	27.1	25.2	2.40941	1571
		2	5.98578	0.199882	28.3	23.5	2.62105	1436
		3	2.98867	0.0814321	27.7	24.5	2.50833	1488
14:00:16:00		1	5.50091	0.122924	27.6	24.8	2.48554	1335
		2	8.33408	0.209394	27	23.3	2.45788	1368
		3	5.87408	0.136347	26.5	22.7	2.41383	1301
16:00-18:00		1	7.27515	0.206757	27.5	24.6	2.47936	1037
		2	2.64955	0.0608155	27	22.9	2.4707	1003
		3	6.84326	0.18799	27	25.5	2.38738	1036

## Sheet: MRH-DS
Time	Genetype	Replicate	Tr	gs	T	RH	VPD	PAR
			mmol·m−2·s−1	mol·m−2·s−1	℃	%	kPa	μmol·m−2·s−1
8:00-10:00	12 Song 1	1	2.86509	0.148045	19.3	48.7	1.09288	530
		2	4.66872	0.262533	19.5	51.5	1.04453	515
		3	3.34739	0.183571	19.5	45.9	1.16513	480
10:00-12:00		1	4.37495	0.224151	24.9	34.3	1.88745	860
		2	4.83521	0.159238	25.2	28.5	2.08659	870
		3	2.15844	0.160279	24.6	28.3	2.02767	904
12:00-14:00		1	2.24262	0.121465	29.1	23.7	2.72327	1250
		2	1.98182	0.0846865	29.2	22.8	2.76946	1286
		3	1.38315	0.059629	29.1	23.6	2.72683	1272
14:00:16:00		1	4.05496	0.290366	29.9	21.6	2.91434	1503
		2	3.38232	0.186804	30	22.3	2.903	1502
		3	2.54067	0.179689	30.2	21.5	2.96273	1445
16:00-18:00		1	3.51907	0.20892	27.5	26.6	2.41359	1205
		2	2.13459	0.170609	27.1	23.5	2.46417	1200
		3	1.91854	0.114752	27	23.1	2.46429	1186
8:00-10:00	Zhoumai 18	1	1.58183	0.0694653	20.1	44.9	1.22591	500
		2	2.61069	0.119467	20.8	40.2	1.38172	495
		3	1.48249	0.0644033	21.3	43.6	1.33867	509
10:00-12:00		1	2.75893	0.101561	26.1	28.2	2.196	896
		2	2.23617	0.0684731	26.4	30.1	2.17146	889
		3	3.99732	0.180991	26.7	31.6	2.15816	912
12:00-14:00		1	3.03687	0.0779661	27	27.1	2.33611	1280
		2	1.89908	0.0466333	25.9	32.1	2.05523	1313
		3	1.74499	0.043746	26.8	26.4	2.33428	1285
14:00:16:00		1	5.43795	0.158416	29.1	22.3	2.77323	1484
		2	3.97345	0.1105	29.8	23.7	2.82193	1468
		3	4.57246	0.120466	29.8	23	2.84782	1470
16:00-18:00		1	8.06198	0.259657	27.3	25.1	2.43766	1212
		2	5.98208	0.173853	26.8	27.3	2.30573	1175
		3	3.3802	0.0906907	26.9	23.7	2.43246	1167
8:00-10:00	Jing 411	1	1.0691	0.0782051	22.3	37.1	1.575	524
		2	0.832357	0.16353	21.9	40.9	1.44858	549
		3	2.30794	0.086589	22.3	37.3	1.56999	540
10:00-12:00		1	1.83086	0.0304882	26.6	28.4	2.24745	948
		2	3.52183	0.0235483	27.1	33	2.15816	978
		3	2.07263	0.069018	27.2	26.5	2.37979	962
12:00-14:00		1	8.46202	0.322104	28.6	26.6	2.55374	1318
		2	8.72985	0.233381	29	26.7	2.60289	1325
		3	6.17547	0.106102	29	23.5	2.71652	1376
14:00:16:00		1	5.58471	0.168595	29.8	22.3	2.87371	1415
		2	6.98279	0.299053	29.4	20.4	2.88477	1425
		3	3.75039	0.176032	28.6	24.1	2.64072	1355
16:00-18:00		1	5.28814	0.151811	26.6	22.7	2.42637	1146
		2	2.94186	0.0731266	27	24.6	2.41622	1132
		3	6.91009	0.200337	27	27.6	2.32009	1168
8:00-10:00	Lankaiaizao 8	1	2.39771	0.110572	22.7	38.4	1.57565	570
		2	1.16601	0.0436011	22.9	39.5	1.56405	589
		3	1.36941	0.0560543	22.9	41.6	1.50976	576
10:00-12:00		1	5.5995	0.215315	27.8	24.5	2.52126	992
		2	3.74509	0.158498	28.2	25.6	2.53607	999
		3	2.06001	0.106909	27.8	24	2.53796	1064
12:00-14:00		1	2.87818	0.0792637	28.6	26.4	2.5607	1370
		2	0.899202	0.0226476	29.1	25.1	2.6733	1427
		3	1.8704	0.0484163	29.1	23	2.74825	1442
14:00:16:00		1	8.06858	0.247717	26.6	23.4	2.4044	1320
		2	2.72142	0.106258	26.2	22	2.39806	1365
		3	6.58819	0.183268	26.8	25.2	2.37234	1341
16:00-18:00		1	5.56646	0.151966	27.8	21.5	2.62144	1110
		2	6.64199	0.185876	27	23.3	2.45788	1103
		3	4.10145	0.0977737	26.4	23.5	2.37649	1095
8:00-10:00	Chang 6878	1	5.92279	0.246347	23.3	38.3	1.62926	605
		2	3.85965	0.105283	23.4	35	1.72552	608
		3	2.05417	0.113592	23.3	35.7	1.69792	608
10:00-12:00		1	5.33513	0.233455	27.1	27.6	2.3321	1036
		2	2.56405	0.142332	28	31.9	2.29763	1052
		3	2.7438	0.10641	28.4	25.9	2.55185	1041
12:00-14:00		1	3.96794	0.0705271	29	23.2	2.72717	1402
		2	6.26544	0.261647	28.9	21.4	2.77689	1482
		3	4.26706	0.11451	27.7	24.8	2.49836	1520
14:00:16:00		1	11.4556	0.316347	27.1	22.4	2.4996	1346
		2	7.5294	0.223499	26.6	24.2	2.37929	1323
		3	2.38579	0.148662	26.4	24.3	2.35164	1357
16:00-18:00		1	7.80469	0.20489	26.8	23.6	2.42308	1066
		2	3.08028	0.106477	26.5	26.7	2.28892	1062
		3	7.13735	0.216413	27.1	26.8	2.35787	1003
8:00-10:00	Jinmai 47	1	3.9087	0.167598	23.4	35.4	1.7149	630
		2	2.5317	0.154011	23.2	34.5	1.72047	640
		3	1.69854	0.105051	23.3	35.1	1.71376	632
10:00-12:00		1	3.89003	0.122239	27	26.1	2.36815	1058
		2	3.35347	0.0830508	27.6	25	2.47893	1064
		3	1.54231	0.0456485	28.1	30.8	2.34675	1070
12:00-14:00		1	3.43232	0.095748	26.4	23.1	2.38892	1571
		2	5.38104	0.157682	26.8	27.9	2.2867	1436
		3	1.45371	0.103681	28.3	28.7	2.44288	1488
14:00:16:00		1	9.91806	0.259011	26.3	25.2	2.31165	1335
		2	5.87601	0.130276	26.5	25.3	2.33264	1368
		3	2.3967	0.104882	27.2	23	2.49311	1301
16:00-18:00		1	2.60108	0.0509711	27.5	26.7	2.4103	1037
		2	2.29445	0.0667197	26.6	25	2.35418	1003
		3	2.90771	0.0588454	26.6	25	2.35418	1036

## Sheet: HRH-WW
Time	Genetype	Replicate	Tr	gs	T	RH	VPD	PAR
			mmol·m−2·s−1	mol·m−2·s−1	℃	%	kPa	μmol·m−2·s−1
8:00-10:00	12 Song 1	1	4.59	0.344	19.5	48.4	0.996117	470
		2	4.84	0.404	19.7	45.2	1.0696	485
		3	3.94	0.315	19.6	44.7	1.07344	492
10:00-12:00		1	3.71	0.378	22.6	36.9	1.44234	867
		2	4.27	0.421	22.6	37.7	1.42405	872
		3	4.64	0.422	21.1	39.5	1.27492	885
12:00-14:00		1	4.36	0.249	23.9	37.7	1.52701	1350
		2	4.52	0.266	24.6	39.7	1.53421	1352
		3	5.34	0.334	24.3	41	1.47734	1264
14:00:16:00		1	5.3	0.206	27.7	31	2.06688	1432
		2	4.23	0.136	27.1	31.5	1.98861	1425
		3	4.23	0.136	27.7	29.6	2.10882	1358
16:00-18:00		1	5.25	0.18	27	30.1	2.01866	1205
		2	3.56	0.0844	27.3	33.7	1.94498	1186
		3	3.84	0.0955	28	33	2.03857	1182
8:00-10:00	Zhoumai 18	1	4.36	0.535	19.9	48.6	1.01433	500
		2	3.85	0.4	20.1	47.1	1.05545	505
		3	4.39	0.482	20.4	43	1.15611	518
10:00-12:00		1	5.97	0.395	22.1	37	1.40168	880
		2	5.84	0.395	21.1	41.4	1.23488	912
		3	5.26	0.279	20.3	43	1.14979	924
12:00-14:00		1	2.92	0.369	24.1	34.7	1.61774	1280
		2	4.97	0.352	24.5	38.9	1.54631	1305
		3	2.82	0.302	24.3	38.9	1.52992	1320
14:00:16:00		1	5.26	0.171	26.8	29.5	2.01476	1323
		2	6.1	0.202	27	36.9	1.82228	1335
		3	5.04	0.155	27	29.9	2.02443	1342
16:00-18:00		1	4.59	0.173	28.1	35.3	1.97885	1172
		2	4.73	0.183	27.8	28.1	2.165	1167
		3	5.02	0.196	27.6	29.7	2.09487	1152
8:00-10:00	Jing 411	1	3.92	0.403	20.3	46.3	1.08323	570
		2	4.08	0.439	20.6	45.4	1.11961	579
		3	3.39	0.324	20.5	49.7	1.02581	595
10:00-12:00		1	4.96	0.35	23.9	35.5	1.58093	992
		2	4.19	0.285	23.9	36.3	1.56133	1002
		3	4.39	0.302	24.2	34.2	1.63885	1110
12:00-14:00		1	3.14	0.254	23.4	37	1.50337	1370
		2	6.2	0.365	23.6	40.7	1.43033	1361
		3	6.17	0.363	23.6	37.5	1.50752	1389
14:00:16:00		1	5.64	0.1884	27.5	31	2.04544	1368
		2	6.29	0.257	28.1	29.9	2.14401	1368
		3	7.75	0.229	27.8	29.7	2.11683	1366
16:00-18:00		1	5.28	0.201	27.5	30.8	2.05137	1110
		2	8.42	0.368	28.2	30.5	2.13673	1095
		3	6.68	0.265	28.1	29.4	2.1593	1085
8:00-10:00	Lankaiaizao 8	1	4.54	0.339	21.3	41.6	1.24414	605
		2	2.69	0.246	21.3	45.2	1.16744	608
		3	3.85	0.266	21.4	46	1.15667	621
10:00-12:00		1	4.2	0.288	24.7	33.8	1.69331	1036
		2	3.72	0.284	24.8	37.1	1.61748	1041
		3	4.86	0.305	24.6	38.3	1.56983	1150
12:00-14:00		1	5.17	0.387	24.3	41.6	1.46232	1402
		2	6.81	0.322	24.2	41.2	1.4645	1413
		3	4.85	0.391	24.4	38.4	1.55069	1466
14:00:16:00		1	6.93	0.244	27	31.2	1.98689	1370
		2	6.64	0.229	26.7	36.3	1.81091	1325
		3	4.64	0.2	27.6	29.3	2.10679	1345
16:00-18:00		1	5.8	0.233	28.7	29.8	2.21495	1066
		2	3.79	0.138	28.5	29.6	2.19836	1053
		3	5.17	0.144	28.7	28.2	2.26543	1049
8:00-10:00	Chang 6878	1	4.44	0.301	21.5	41.3	1.2642	630
		2	5.94	0.351	21.3	41.8	1.23988	638
		3	5.1	0.548	20.9	46.6	1.11309	668
10:00-12:00		1	2.75	0.243	24.9	39.4	1.56663	1058
		2	3.81	0.257	24.5	38.7	1.55138	1070
		3	3.52	0.317	23.5	36.4	1.52585	1176
12:00-14:00		1	5.9	0.315	23	36.1	1.49244	1535
		2	3.24	0.338	24.1	38.2	1.53103	1546
		3	2.75	0.27	24.4	36.1	1.60859	1610
14:00:16:00		1	3.18	0.213	29.3	28.1	2.34002	1302
		2	2.38	0.203	28.9	31.4	2.18698	1325
		3	5.73	0.207	29.2	29.8	2.27294	1290
16:00-18:00		1	3.45	0.2	27.5	30.8	2.05137	1037
		2	8.73	0.217	28.4	29.1	2.20252	1036
		3	4.24	0.297	28.1	29.5	2.15624	1015
8:00-10:00	Jinmai 47	1	3.62	0.341	21.3	40.6	1.26544	679
		2	4.13	0.421	21.9	39.9	1.32275	682
		3	3.79	0.372	21.5	41.7	1.25559	691
10:00-12:00		1	3.37	0.214	23.5	42.5	1.3795	1216
		2	3.94	0.259	23.7	36.5	1.53986	1190
		3	4.35	0.281	23.8	40	1.46279	1257
12:00-14:00		1	4.62	0.232	24.7	37.4	1.60123	1568
		2	3.09	0.142	24.8	33.8	1.70233	1572
		3	3.04	0.14	24.5	34.4	1.6602	1584
14:00:16:00		1	3.27	0.115	28	30.1	2.12681	1309
		2	4.72	0.171	28.1	30.6	2.1226	1311
		3	6.16	0.241	28.1	29.3	2.16236	1326
16:00-18:00		1	6	0.23	27.8	32.2	2.04155	1006
		2	4.65	0.171	27.7	32.8	2.01297	1003
		3	5.16	0.191	27.9	29.4	2.13696	997

## Sheet: HRH-DS
Time	Genetype	Replicate	Tr	gs	T	RH	VPD	PAR
			mmol·m−2·s−1	mol·m−2·s−1	℃	%	kPa	μmol·m−2·s−1
8:00-10:00	12 Song 1	1	2.08	0.282	19.9	45.3	1.07945	470
		2	3.31	0.339	19.7	46	1.05399	485
		3	3.23	0.311	19.8	44.3	1.09316	492
10:00-12:00		1	2.37	0.162	21.9	41.8	1.28093	867
		2	2.22	0.144	22.7	40.8	1.36051	872
		3	1.65	0.102	22.2	39.1	1.3623	885
12:00-14:00		1	3.37	0.178	24	39.8	1.48345	1350
		2	2.21	0.111	24.3	41.3	1.46983	1352
		3	3.31	0.173	24	37.2	1.54751	1264
14:00:16:00		1	3.38	0.0682	27.6	32.3	2.0174	1432
		2	3.45	0.07	27.3	29.5	2.06819	1425
		3	5.51	0.181	27	30.3	2.01288	1358
16:00-18:00		1	4.03	0.148	27.8	31.2	2.07166	1205
		2	3.7	0.134	27.3	31.2	2.01832	1186
		3	3.71	0.135	27.5	30.6	2.05729	1182
8:00-10:00	Zhoumai 18	1	3.27	0.318	20.6	44.6	1.13602	500
		2	2.19	0.192	20.4	46.1	1.09323	505
		3	3	0.273	20.7	45.8	1.1175	518
10:00-12:00		1	2.86	0.194	22.2	39.3	1.35783	880
		2	2.59	0.164	21	43.8	1.17786	912
		3	1.18	0.0671	22.4	40	1.35676	924
12:00-14:00		1	3.11	0.15	24.4	39.9	1.51293	1280
		2	3.71	0.184	24.1	40.6	1.47157	1305
		3	3.95	0.201	23.6	39.6	1.45686	1320
14:00:16:00		1	3.61	0.107	26.9	30.6	1.99375	1323
		2	5.65	0.193	26.7	32.3	1.92462	1335
		3	5.04	0.181	26.6	30.9	1.95414	1342
16:00-18:00		1	7.09	0.203	27.6	29.7	2.09487	1172
		2	4.31	0.155	27.5	35	1.92686	1167
		3	3.14	0.208	27.6	30.7	2.06508	1152
8:00-10:00	Jing 411	1	3.99389	0.201	20.2	46.3	1.07731	570
		2	4.64042	0.301	21.2	44	1.18653	579
		3	3.96912	0.184	21	46.7	1.11709	595
10:00-12:00		1	2.10286	0.13	23.9	37.9	1.52211	992
		2	3.26932	0.231	24.9	39.8	1.55629	1002
		3	2.39913	0.273	24.4	36.6	1.596	1110
12:00-14:00		1	3.80545	0.269	23.9	37.2	1.53927	1370
		2	3.94216	0.198	24.4	36.3	1.60355	1361
		3	3.90821	0.252	24.5	41.3	1.48558	1389
14:00:16:00		1	4.33651	0.0875	28	28.5	2.17549	1368
		2	6.11643	0.127	27.7	29.3	2.11781	1368
		3	4.37448	0.078	26.8	32	1.94332	1366
16:00-18:00		1	3.83189	0.104	27.9	29	2.14906	1110
		2	4.0806	0.184	27.8	30.7	2.08671	1095
		3	3.91304	0.106	28	30.7	2.10855	1085
8:00-10:00	Lankaiaizao 8	1	2.17	0.282	21.1	41.9	1.22434	605
		2	3.58	0.36	21.1	41.4	1.23488	608
		3	3.58	0.361	21.2	40.3	1.26493	621
10:00-12:00		1	4.71	0.409	23.8	40.2	1.45792	1036
		2	4.33	0.345	24.2	35.8	1.599	1041
		3	3.21	0.225	23.9	37.7	1.52701	1150
12:00-14:00		1	3.34	0.186	23.7	43.6	1.36769	1402
		2	5.28	0.313	23.7	43.5	1.37011	1413
		3	3.53	0.126	24	36.3	1.56969	1466
14:00:16:00		1	2.99	0.0895	28	32.2	2.06291	1370
		2	4.77	0.148	28.1	30.9	2.11343	1325
		3	4.78	0.147	28.9	36	2.04033	1345
16:00-18:00		1	3.41	0.121	28.2	29.8	2.15825	1066
		2	3.47	0.122	28.4	28.7	2.21495	1053
		3	4.4	0.161	27.6	29.1	2.11275	1049
8:00-10:00	Chang 6878	1	2.32	0.189	21.1	48.7	1.08104	630
		2	1.32	0.0998	21.3	41.9	1.23775	638
		3	2.07	0.166	21.4	44.6	1.18666	668
10:00-12:00		1	3.82	0.248	24	36.6	1.5623	1058
		2	1.9	0.265	24.6	36.6	1.61309	1070
		3	3.1	0.269	23.9	45.5	1.33583	1176
12:00-14:00		1	3.48	0.111	24.5	34.6	1.65514	1535
		2	3.77	0.178	24.8	35.6	1.65605	1546
		3	3.68	0.172	24.5	37.5	1.58175	1610
14:00:16:00		1	2.88	0.175	29.1	26	2.38364	1302
		2	2.05	0.102	28	31.9	2.07204	1325
		3	4.5	0.159	27.8	37.4	1.88497	1290
16:00-18:00		1	4.88	0.177	28.3	29.8	2.16949	1037
		2	2.3	0.167	28.3	29.7	2.17258	1036
		3	4.69	0.168	28.1	29	2.17154	1015
8:00-10:00	Jinmai 47	1	4.03	0.387	21.4	41.7	1.24878	679
		2	2.23	0.168	21.4	43.8	1.2038	682
		3	2.73	0.219	21.8	43.6	1.23461	691
10:00-12:00		1	3.37	0.205	23.8	39	1.48717	1216
		2	4.84	0.324	23.2	41.5	1.38108	1190
		3	3.35	0.202	24.1	38.5	1.5236	1257
12:00-14:00		1	3.16	0.15	25.2	43.6	1.48144	1568
		2	2.79	0.127	26.4	41.1	1.64827	1572
		3	4.44	0.218	27.6	39.4	1.80582	1584
14:00:16:00		1	5.63	0.119	27.1	33.5	1.93055	1309
		2	3.16	0.0709	27.9	29	2.14906	1311
		3	4.51	0.0878	28	29.2	2.15419	1326
16:00-18:00		1	3.47	0.208	27.7	32	2.03693	1006
		2	3.17	0.108	27.8	32.6	2.0295	1003
		3	3.73	0.16	28.9	32	2.16785	997
