# Supplementary material for: Stomatal conductance bears no correlation with transpiration rate in wheat during their diurnal variation under high air humidity
Source: PeerJ. 2020 Apr 28;8:e8927. doi: 10.7717/peerj.8927 (PMC7199760; doi:10.7717/peerj.8927)
Supplement: Supplemental Information 2 — The data were collected from 6 genotypes at each measurement day in Table 2. WW, well-watered; DS, drought stress; LRH, low relative humidity; MRH, moderate relative humidity; HRH, high relative humidity. [file peerj-08-8927-s002.xls]

## Sheet: LRH
13-April-18		Genetype	12 Song			Zhoumai 18			Jing 411			Lankaoaizao 8			Chang 6878			Jinmai 47
	Time	Replicates	gs	A	Tr	gs	A	Tr	gs	A	Tr	gs	A	Tr	gs	A	Tr	gs	A	Tr
			mol·m−2·s−1	μmol·m−2·s−1	mmol·m−2·s−1	mol·m−2·s−1	μmol·m−2·s−1	mmol·m−2·s−1	mol·m−2·s−1	μmol·m−2·s−1	mmol·m−2·s−1	mol·m−2·s−1	μmol·m−2·s−1	mmol·m−2·s−1	mol·m−2·s−1	μmol·m−2·s−1	mmol·m−2·s−1	mol·m−2·s−1	μmol·m−2·s−1	mmol·m−2·s−1
WW	8:00-10:00	1	0.1907	11.8525	4.43187	0.1304	7.3037	3.1296	0.2033	13.6211	7.50177	0.0601	3.63895	1.24029	0.1783	12.6593	3.22339	0.2153	13.02	4.60062
		2	0.1052	6.48389	2.12974	0.0649	4.2185	1.5576	0.217	15.7123	4.774	0.064	5.02161	1.65254	0.1575	12.7973	4.77781	0.2192	14.3834	4.67092
		3	0.1011	7.13968	2.07028	0.1259	9.08828	3.47399	0.3347	17.1001	6.60272	0.0749	3.84463	1.40807	0.1884	11.6395	4.4274	0.1299	9.2229	3.1176
	10:00-12:00	1	0.3043	17.1456	7.07193	0.1583	10.2895	3.7992	0.4225	21.9959	9.295	0.0436	2.78203	1.0028	0.0512	3.6352	1.2032	0.28	26.3826	8.02051
		2	0.2177	13.7475	4.24612	0.1284	8.346	4.47196	0.3699	35.0109	11.547	0.0281	1.63178	0.394883	0.109	7.739	2.97454	0.1716	13.7493	4.1184
		3	0.2402	14.6829	5.58225	0.1847	13.6088	4.4328	0.44	20.7757	9.68	0.021	1.31205	0.4956	0.0357	2.01066	1.06494	0.2653	18.8363	5.21322
	12:00-14:00	1	0.2685	18.9615	4.93146	0.1014	6.591	2.4336	0.2466	16.5222	7.32402	0.2232	14.7647	7.3656	0.1926	19.656	4.5261	0.2079	10.7609	3.9896
		2	0.272	19.2086	6.32128	0.0527	3.4255	1.68339	0.2117	12.1839	5.20782	0.3045	24.6069	8.00835	0.1639	9.55563	5.93292	0.1192	15.4632	4.0608
		3	0.1912	13.5025	4.44349	0.0754	10.1061	1.8096	0.3991	26.7397	5.33955	0.1285	19.0515	5.19028	0.1725	10.4163	4.05375	0.1639	14.6369	3.9336
	14:00:16:00	1	0.2168	12.3104	4.03843	0.1076	13.1192	3.21738	0.1935	14.9645	2.257	0.123	8.61	3.6162	0.2689	40.0997	3.5041	0.1313	9.3223	3.1512
		2	0.1331	10.3995	3.09324	0.1676	24.2309	4.0224	0.1237	8.2879	2.7214	0.2353	24.8746	6.21192	0.1288	7.96315	1.84515	0.1733	12.3043	2.51592
		3	0.2384	12.8358	3.54042	0.2065	15.3416	4.956	0.0982	10.5794	3.1604	0.1659	22.6878	4.71156	0.2254	16.0034	5.2969	0.0808	8.7368	1.9392
	16:00-18:00	1	0.12	5.4744	3.7888	0.082	5.33	4.968	0.1	6.7	3.2	0.1	16.4037	6.88716	0.12	7.52	2.82	0.089	10.319	3.136
		2	0.105	8.4151	3.4402	0.067	7.355	2.608	0.085	5.695	4.87	0.085	18.0496	8.00482	0.105	8.455	2.4675	0.074	5.254	1.776
		3	0.135	9.5337	2.1374	0.097	6.305	3.328	0.115	9.705	2.7485	0.115	35.431	8.12119	0.135	5.585	3.1725	0.104	7.384	2.496
DS	8:00-10:00	1	0.0781	4.95375	1.81504	0.0661	4.97072	1.48064	0.1182	6.76104	2.6004	0.0765	4.90711	1.4841	0.0829	6.91699	2.63555	0.0974	6.9154	2.02761
		2	0.1184	8.36141	2.29341	0.1015	6.5975	2.1721	0.1121	7.47707	2.10702	0.0645	3.65786	1.5093	0.1412	10.0252	3.02015	0.0901	6.3971	2.1624
		3	0.1093	7.71877	1.7284	0.0813	5.21946	1.66218	0.0741	4.68312	2.05998	0.1351	10.3189	3.40452	0.1261	7.65431	2.96335	0.1142	6.7074	2.7408
	10:00-12:00	1	0.0729	4.34681	1.6942	0.0497	3.05655	1.1928	0.0644	4.58528	1.72592	0.0539	3.773	1.54693	0.0854	6.38842	2.46753	0.1037	10.9588	1.69435
		2	0.0775	4.35593	1.52182	0.0534	3.10788	1.2816	0.0963	7.08768	2.1186	0.116	6.44188	1.40941	0.0639	7.49266	1.96136	0.0971	8.74592	2.79335
		3	0.0684	4.32072	1.58962	0.0523	3.92773	1.4982	0.0951	5.22826	2.47335	0.061	4.27	1.403	0.0793	5.6303	1.99968	0.0867	7.19334	2.0808
	12:00-14:00	1	0.0993	6.53394	2.30773	0.064	3.94146	1.71776	0.054	3.2292	1.188	0.0495	5.12052	2.13181	0.1127	9.53657	3.68917	0.1061	5.91818	2.00809
		2	0.0425	3.00135	0.9877	0.0684	4.32288	1.6416	0.0564	3.7788	1.42692	0.0688	4.40842	1.54164	0.0962	10.0962	3.2607	0.1062	7.5402	2.5488
		3	0.0595	3.51403	0.924206	0.0649	3.86155	2.45339	0.0845	7.03548	1.76605	0.101	7.07	2.87558	0.0907	8.72491	2.89319	0.0861	5.97506	2.67764
	14:00:16:00	1	0.0668	4.71742	1.55243	0.0615	3.6925	1.861	0.0509	4.63212	1.22171	0.0566	2.89064	1.3018	0.0754	5.3534	2.7719	0.0679	4.8209	1.6296
		2	0.0701	2.50257	1.62912	0.0576	2.712	1.54541	0.046	2.63708	1.012	0.0499	5.15818	1.31237	0.0478	5.0918	1.6893	0.0871	5.0871	2.0904
		3	0.0611	2.63952	1.41996	0.0593	4.9245	1.4232	0.0589	4.6121	1.2958	0.0406	4.25825	0.9338	0.0712	7.0552	2.5372	0.0879	7.17553	1.69792
	16:00-18:00	1	0.0383	1.65456	1.52719	0.0368	1.136	1.42416	0.0778	6.2126	2.1556	0.0545	4.815	2.2535	0.0595	6.4395	2.39825	0.0778	4.5238	1.8672
		2	0.035	1.2775	0.8134	0.0318	1.251	0.67416	0.0482	3.3734	1.1324	0.0694	6.858	1.95014	0.0778	5.5238	1.8283	0.0761	5.4031	2.0654
		3	0.033	1.2474	0.76692	0.0489	1.8215	1.1736	0.0534	3.2378	1.1748	0.0393	4.214	1.9039	0.0581	4.1251	1.62235	0.0533	4.0533	1.2792

## Sheet: MRH
28-April-18		Genetype	12 Song			Zhoumai 18			Jing 411			Lankaoaizao 8			Chang 6878			Jinmai 47
	Time	Replicates	gs	A	Tr	gs	A	Tr	gs	A	Tr	gs	A	Tr	gs	A	Tr	gs	A	Tr
			mol·m−2·s−1	μmol·m−2·s−1	mmol·m−2·s−1	mol·m−2·s−1	μmol·m−2·s−1	mmol·m−2·s−1	mol·m−2·s−1	μmol·m−2·s−1	mmol·m−2·s−1	mol·m−2·s−1	μmol·m−2·s−1	mmol·m−2·s−1	mol·m−2·s−1	μmol·m−2·s−1	mmol·m−2·s−1	mol·m−2·s−1	μmol·m−2·s−1	mmol·m−2·s−1
WW	8:00-10:00	1	0.141563	12.0456	2.58713	0.107758	11.383	2.25397	0.133193	11.1956	2.81157	0.200635	17.4252	5.29383	0.369215	19.2559	7.19368	0.104526	10.2119	2.55013
		2	0.196212	15.9474	3.47955	0.0867464	9.0292	1.91821	0.109244	10.6375	2.18315	0.0872796	9.06586	2.05156	0.203492	17.3294	4.50316	0.15106	9.07754	3.50642
		3	0.247542	19.6345	4.2976	0.0899498	8.56493	1.98907	0.19647	15.6386	4.99859	0.152435	15.0574	3.61818	0.211948	16.7225	4.67287	0.135094	10.7312	3.18804
	10:00-12:00	1	0.367063	20.0523	8.8049	0.104596	9.32865	3.45351	0.123926	17.065	5.86203	0.359077	19.7912	8.27415	0.13421	8.88595	4.2025	0.261901	15.705	7.11057
		2	0.337403	23.7124	7.84432	0.10509	5.5453	1.85579	0.164632	10.6375	2.18315	0.325763	22.0828	9.91679	0.193737	11.3715	5.78037	0.109273	10.8599	3.47003
		3	0.263085	16.0165	7.21683	0.0583303	6.95075	2.04967	0.176928	13.0586	3.95171	0.331744	15.0574	3.61818	0.0837	5.53383	1.67064	0.173837	11.5432	5.12163
	12:00-14:00	1	0.187464	13.7039	5.91748	0.280819	18.221	8.8649	0.23421	15.3416	8.43681	0.227023	14.6765	6.23374	0.345746	19.2011	9.44294	0.107089	10.7951	3.84232
		2	0.193479	8.12533	3.17703	0.302197	18.9166	9.40731	0.106853	9.14284	6.53899	0.435999	22.0828	9.91679	0.355033	19.3107	9.62258	0.199882	14.1299	5.98578
		3	0.212644	16.8208	6.50884	0.322761	20.2941	9.64695	0.16846	13.9088	6.67194	0.231542	12.9407	4.10856	0.386061	20.7412	10.985	0.0814321	7.72992	2.98867
	14:00:16:00	1	0.222205	18.7659	9.59166	0.0999316	10.0174	3.89602	0.307437	17.7324	6.99099	0.214801	12.8566	5.8449	0.294139	12.8678	10.4782	0.122924	11.0619	5.50091
		2	0.16758	15.3186	6.02339	0.214917	17.2073	7.06654	0.206571	15.5021	3.70298	0.160202	9.46266	5.75041	0.294125	13.0132	10.4672	0.209394	14.04	8.33408
		3	0.249472	18.2549	7.99065	0.108104	8.40006	3.53367	0.223359	14.6783	5.24219	0.295188	10.8466	3.83494	0.302038	20.824	10.8824	0.136347	11.6616	5.87408
	16:00-18:00	1	0.108069	11.9315	6.42258	0.157364	13.3497	5.9378	0.218903	15.8112	6.95627	0.129753	8.63431	4.64152	0.249114	17.3429	8.80911	0.206757	13.6894	7.27515
		2	0.0444543	5.38223	1.84943	0.0558794	6.14674	2.37528	0.190766	11.6322	6.23422	0.256818	15.3422	8.19406	0.155208	12.8807	5.9491	0.0608155	4.89893	2.64955
		3	0.0574012	6.96603	2.32991	0.0983262	9.35315	3.88922	0.130166	8.04965	4.77347	0.167445	12.8281	5.98661	0.15476	13.1349	5.93885	0.18799	15.1215	6.84326
DS	8:00-10:00	1	0.148045	14.508	2.86509	0.0694653	8.25922	1.58183	0.0782051	3.36799	1.0691	0.110572	10.5934	2.39771	0.246347	12.4919	5.92279	0.167598	10.3433	3.9087
		2	0.262533	18.7954	4.66872	0.119467	4.88071	2.61069	0.16353	2.24498	0.832357	0.0436011	4.91935	1.16601	0.105283	9.73559	3.85965	0.154011	7.3855	2.5317
		3	0.183571	16.0027	3.34739	0.0644033	6.86315	1.48249	0.086589	6.91002	2.30794	0.0560543	5.81376	1.36941	0.113592	6.52528	2.05417	0.105051	3.17284	1.69854
	10:00-12:00	1	0.224151	17.504	4.37495	0.101561	7.77258	2.75893	0.0304882	8.08061	1.83086	0.215315	14.1312	5.5995	0.233455	18.7327	5.33513	0.122239	13.7648	3.89003
		2	0.159238	16.0842	4.83521	0.0684731	10.4409	2.23617	0.0235483	14.7636	3.52183	0.158498	11.2188	3.74509	0.142332	9.89293	2.56405	0.0830508	9.58358	3.35347
		3	0.160279	16.4005	2.15844	0.180991	12.258	3.99732	0.069018	8.09506	2.07263	0.106909	5.27818	2.06001	0.10641	11.5882	2.7438	0.0456485	5.41415	1.54231
	12:00-14:00	1	0.121465	11.6422	2.24262	0.0779661	7.14094	3.03687	0.322104	16.048	8.46202	0.0792637	7.61961	2.87818	0.0705271	7.02168	3.96794	0.095748	5.11196	3.43232
		2	0.0846865	7.14965	1.98182	0.0466333	3.34671	1.89908	0.233381	15.9998	8.72985	0.0226476	1.86786	0.899202	0.261647	15.6681	6.26544	0.157682	11.7084	5.38104
		3	0.059629	5.28367	1.38315	0.043746	4.08207	1.74499	0.106102	12.273	6.17547	0.0484163	4.15206	1.8704	0.11451	11.0717	4.26706	0.103681	3.57726	1.45371
	14:00:16:00	1	0.290366	12.1188	4.05496	0.158416	13.7528	5.43795	0.168595	11.6661	5.58471	0.247717	16.755	8.06858	0.316347	17.3688	11.4556	0.259011	15.2384	9.91806
		2	0.186804	9.02713	3.38232	0.1105	7.66435	3.97345	0.299053	14.8781	6.98279	0.106258	5.01688	2.72142	0.223499	10.8391	7.5294	0.130276	8.57616	5.87601
		3	0.179689	13.6508	2.54067	0.120466	8.63605	4.57246	0.176032	9.11115	3.75039	0.183268	10.9521	6.58819	0.148662	4.16052	2.38579	0.104882	3.31036	2.3967
	16:00-18:00	1	0.20892	7.54926	3.51907	0.259657	15.0356	8.06198	0.151811	12.7493	5.28814	0.151966	10.9096	5.56646	0.20489	15.4077	7.80469	0.0509711	4.75475	2.60108
		2	0.170609	9.82745	2.13459	0.173853	12.9178	5.98208	0.0731266	7.09257	2.94186	0.185876	13.921	6.64199	0.106477	6.38412	3.08028	0.0667197	4.73221	2.29445
		3	0.114752	6.41502	1.91854	0.0906907	6.48563	3.3802	0.200337	12.1344	6.91009	0.0977737	8.97589	4.10145	0.216413	11.6514	7.13735	0.0588454	4.77729	2.90771

## Sheet: HRH
2018-05-06		Genetype	12 Song			Zhoumai 18			Jing 411			Lankaoaizao 8			Chang 6878			Jinmai 47
	Time	Replicate	gs	A	Tr	gs	A	Tr	gs	A	Tr	gs	A	Tr	gs	A	Tr	gs	A	Tr
			mol·m−2·s−1	μmol·m−2·s−1	mmol·m−2·s−1	mol·m−2·s−1	μmol·m−2·s−1	mmol·m−2·s−1	mol·m−2·s−1	μmol·m−2·s−1	mmol·m−2·s−1	mol·m−2·s−1	μmol·m−2·s−1	mmol·m−2·s−1	mol·m−2·s−1	μmol·m−2·s−1	mmol·m−2·s−1	mol·m−2·s−1	μmol·m−2·s−1	mmol·m−2·s−1
WW	8:00-10:00	1	0.344	17.2	4.59	0.535	18.7	4.36	0.403	17.7	3.92	0.339	19.5	4.54	0.301	14.2	4.44	0.341	16.7	3.62
		2	0.404	16.7	4.84	0.4	18.4	3.85	0.439	17.7	4.08	0.246	12.4	2.69	0.351	16	5.94	0.421	19.5	4.13
		3	0.315	14.7	3.94	0.482	20.5	4.39	0.324	17.1	3.39	0.266	18	3.85	0.548	19.8	5.1	0.372	16.3	3.79
	10:00-12:00	1	0.378	15.8	3.71	0.395	21.2	5.97	0.35	21.1	4.96	0.288	17.1	4.2	0.243	15.4	2.75	0.214	13.6	3.37
		2	0.421	16.9	4.27	0.395	21.3	5.84	0.285	17.2	4.19	0.284	17.9	3.72	0.257	15.1	3.81	0.259	16.6	3.94
		3	0.422	19.6	4.64	0.279	19.8	5.26	0.302	17.8	4.39	0.305	18.4	4.86	0.317	18.5	3.52	0.281	18.2	4.35
	12:00-14:00	1	0.249	17.2	4.36	0.369	13.8	2.92	0.254	12	3.14	0.387	21.9	5.17	0.315	23.3	5.9	0.232	19.1	4.62
		2	0.266	14.1	4.52	0.352	21.1	4.97	0.365	19.7	6.2	0.322	22.5	6.81	0.338	22.5	3.24	0.142	10.8	3.09
		3	0.334	18.4	5.34	0.302	13.2	2.82	0.363	19.8	6.17	0.391	20	4.85	0.27	15.4	2.75	0.14	10.9	3.04
	14:00:16:00	1	0.206	6.24	5.3	0.171	10.1	5.26	0.1884	10.11	5.64	0.244	13.1	6.93	0.213	12.8	3.18	0.115	6.25	3.27
		2	0.136	6.39	4.23	0.202	12.3	6.1	0.257	13.4	6.29	0.229	14.2	6.64	0.203	9.57	2.38	0.171	10.5	4.72
		3	0.136	6.27	4.23	0.155	9.18	5.04	0.229	13.4	7.75	0.2	7.95	4.64	0.207	12.6	5.73	0.241	13.2	6.16
	16:00-18:00	1	0.18	9.74	5.25	0.173	10.1	4.59	0.201	8.41	5.28	0.233	10.7	5.8	0.2	11.1	3.45	0.23	10.5	6
		2	0.0844	4.6	3.56	0.183	10.6	4.73	0.368	14.9	8.42	0.138	7.32	3.79	0.217	13.5	8.73	0.171	7.98	4.65
		3	0.0955	5.53	3.84	0.196	11.2	5.02	0.265	12.2	6.68	0.144	9.55	5.17	0.297	15.1	4.24	0.191	9.05	5.16
DS	8:00-10:00	1	0.282	8.1	2.08	0.318	15.6	3.27	0.201	16.8	3.99389	0.282	9.75	2.17	0.189	10.4	2.32	0.387	16.3	4.03
		2	0.339	13.8	3.31	0.192	9.36	2.19	0.301	13.2	4.64042	0.36	11.1	3.58	0.0998	6.9	1.32	0.168	7.53	2.23
		3	0.311	14.3	3.23	0.273	13.9	3	0.184	15.9	3.96912	0.361	13.4	3.58	0.166	8.08	2.07	0.219	12.4	2.73
	10:00-12:00	1	0.162	9.19	2.37	0.194	14.5	2.86	0.13	11.55	2.10286	0.409	20.9	4.71	0.248	17.2	3.82	0.205	14.1	3.37
		2	0.144	8.98	2.22	0.164	11.7	2.59	0.231	8.46	3.26932	0.345	16.9	4.33	0.265	12.9	1.9	0.324	17.6	4.84
		3	0.102	4.81	1.65	0.0671	3.94	1.18	0.273	14.9	2.39913	0.225	12.5	3.21	0.269	16.5	3.1	0.202	10.3	3.35
	12:00-14:00	1	0.178	12.6	3.37	0.15	12.3	3.11	0.269	12.86	3.80545	0.186	12.9	3.34	0.111	9.92	3.48	0.15	12.9	3.16
		2	0.111	9.34	2.21	0.184	14.3	3.71	0.198	10.4	3.94216	0.313	20.4	5.28	0.178	15.9	3.77	0.127	11.7	2.79
		3	0.173	12.5	3.31	0.201	15.3	3.95	0.252	13.3	3.90821	0.126	9.92	3.53	0.172	15.1	3.68	0.218	17.5	4.44
	14:00:16:00	1	0.0682	1.08	3.38	0.107	6.26	3.61	0.0875	4.77	4.33651	0.0895	3.21	2.99	0.175	8.47	2.88	0.119	7.09	5.63
		2	0.07	1.55	3.45	0.193	10.8	5.65	0.127	5.2	6.11643	0.148	8.78	4.77	0.102	3.36	2.05	0.0709	3.85	3.16
		3	0.181	7.61	5.51	0.181	10.2	5.04	0.078	3.887	4.37448	0.147	7.98	4.78	0.159	9.08	4.5	0.0878	7.79	4.51
	16:00-18:00	1	0.148	6.54	4.03	0.203	13.5	7.09	0.104	2.17	3.83189	0.121	5.75	3.41	0.177	8.11	4.88	0.208	0.443	3.47
		2	0.134	6.31	3.7	0.155	8.98	4.31	0.184	8.31	4.0806	0.122	6.19	3.47	0.167	4.28	2.3	0.108	0.206	3.17
		3	0.135	6.41	3.71	0.208	4.59	3.14	0.106	2.57	3.91304	0.161	9.06	4.4	0.168	6.68	4.69	0.16	1.6	3.73
